# Supplementary material
Source: PubMed Central journal article supplement (PMC2857125)
Supplement: supp_M110.107086_jbc.M110.107086-1.pdf [file supp_M110.107086_jbc.M110.107086-1.pdf]

**Table 1. Oligonucleotides used for sequencing and cloning.** <sup>1</sup>

| Primer name             | Oligonucleotide sequence<br>from 5' to 3'                                          | Target cloning vector  | Description                                                                                                           |
|-------------------------|------------------------------------------------------------------------------------|------------------------|-----------------------------------------------------------------------------------------------------------------------|
| <i>ape2Up</i>           | tacgcggc <u>tttacatat</u> ggccaattt<br>ttaaggg                                     | pET30a(+)<br>pET28a(+) | Up-stream primer for <i>ape2</i> from <i>N. gonorrhoeae</i> ; <i>Nde</i> I                                            |
| <i>ape2Dwn</i>          | tgatgtg <u>tttgAAGCTT</u> tggctgtgt<br>acttga                                      | pET30a(+)<br>pET28a(+) | Down-stream primer for <i>ape2</i> from <i>N. gonorrhoeae</i> ;<br><i>Hind</i> III                                    |
| <i>ape2Up(g)</i>        | tacgcggc <u>tttacatatg</u> Ggccaatt<br>ttaaaggg                                    | pET30a(+)              | Up-stream primer for <i>ape2</i> from <i>N. gonorrhoeae</i> ;<br>frame-shift from G insertion at 4th bp; <i>Nde</i> I |
| <i>ape2-g-removeFwd</i> | gaaggagatatacatatgccaatttt<br>taagggtttggacatg                                     | pACPM17g               | Up-stream primer for site-directed mutagenesis of<br>pACPM17g                                                         |
| <i>ape2-g-removeRev</i> | catgtccaaacccttaaaaattggca<br>tagtgtatatctccttc                                    | pACPM17g               | Down-stream primer for site-directed mutagenesis of<br>pACPM17g                                                       |
| <i>ape2UppET32</i>      | <b>gacgacgacaagat</b> ggc <u>tttattt</u><br>gccaattttta                            | pET32 Ek/LIC           | Up-stream primer for <i>ape2</i> from <i>N. gonorrhoeae</i> ;<br><b>Ek/LIC overhang</b>                               |
| <i>ape2DwnpET32</i>     | <b>gaggagaagcccgg</b> t <u>tttggAAGCTT</u><br>Ttggctgtgt                           | pET32 Ek/LIC           | Down-stream primer for <i>ape2</i> from <i>N. gonorrhoeae</i> ;<br><b>Ek/LIC over-hang</b> ; <i>Hind</i> III          |
| <i>ape2UppBADHisA</i>   | taccggc <u>tttactcgag</u> ccaatttt<br>taagg                                        | pBADHis-A              | Up-stream primer for <i>ape2</i> from <i>N. gonorrhoeae</i> ; <i>Xho</i> I                                            |
| <i>ape2DwnpBADHisA</i>  | tgatgtg <u>tttgAAGCTT</u> tggctgtgt<br>acttga                                      | pBADHis-A              | Down-stream primer for <i>ape2</i> from <i>N. gonorrhoeae</i> ;<br><i>Hind</i> III                                    |
| <i>ape2UppBAD18Cm</i>   | actggc <u>tagcaggagga</u> aattcaccat<br>gccaatttttaagggtttggacatga<br>aaaac        | pBAD18-Cm              | Up-stream primer for <i>ape2</i> from <i>N. gonorrhoeae</i> ; <b>RBS</b> ;<br><i>Nhe</i> I                            |
| <i>ape2DwnpBAD18Cm</i>  | atcgaagc <u>tttcaATGATGATGATGA</u><br><b>TGATG</b> tggctgtgtacttgatggtt<br>cgactcg | pBAD18-Cm              | Down-stream primer for <i>ape2</i> from <i>N. gonorrhoeae</i> ;<br><b>His6-Tag/Stop codon</b> ; <i>Hind</i> III       |
| <i>ape2UppACPM19</i>    | actgaagc <u>ttaggagga</u> aattcaccat<br>gccaatttttaagggtttggacatga<br>aaaac        | pACPM19                | Up-stream primer for <i>ape2</i> from <i>N. gonorrhoeae</i> ; <i>Hind</i><br>III; <b>RBS</b>                          |

|                        |                                                                                           |                    |                                                                                                                                             |
|------------------------|-------------------------------------------------------------------------------------------|--------------------|---------------------------------------------------------------------------------------------------------------------------------------------|
| <i>ape2</i> UppACPM20  | actgg <u>ctagc</u> <b>aggagga</b> aattcaccat<br>ggtgtgggttcagccaaaaccccatca<br>acgcc      | pACPM20            | Up-stream primer for <i>ape2</i> from <i>N. gonorrhoeae</i><br>encoding an N-terminal 26 amino acid truncation;<br><i>NheI</i> ; <b>RBS</b> |
| <i>ape2</i> DwnpACPM19 | cgata <u>aagctt</u> <b>tcaatgatgatgatga</b><br><b>tgatg</b> tggtgtgtacttgatggttg<br>cgtac | pACPM19<br>pACPM20 | Common down-stream primer for pBAD18-Cm based<br>constructs; <i>Hind III</i> ; <b>Stop, His<sub>6</sub>-tag</b>                             |
| <i>ape2</i> UppACPM22  | actg <u>ctcga</u> gtactggcagcagacc                                                        | pACPM22            | Up-stream primer for <i>ape2</i> from <i>N. gonorrhoeae</i><br>encoding an N-terminal 36 amino acid truncation; <i>XhoI</i>                 |
| <i>ape2</i> DwnpACPM21 | cagta <u>aagctt</u> tcatggctgtgtactt<br>gatggttg                                          | pACPM21<br>pACPM22 | Common down-stream primer for pBADHis-A based<br>constructs; <i>Hind III</i>                                                                |

<sup>1</sup>Incorporated restriction sites are indicated by underlined typeface and new features introduced by the primers are indicated in bold typeface and explained in the description. Mismatches with the template sequence are indicated by capital letters.

\*

|                                                 |     |                            |                      |                      |                  |              |                 |                 |         |          |         |        |      |      |      |     |      |     |      |      |     |     |     |   |   |    |   |    |   |     |   |    |   |   |   |   |   |   |   |   |   |   |   |
|-------------------------------------------------|-----|----------------------------|----------------------|----------------------|------------------|--------------|-----------------|-----------------|---------|----------|---------|--------|------|------|------|-----|------|-----|------|------|-----|-----|-----|---|---|----|---|----|---|-----|---|----|---|---|---|---|---|---|---|---|---|---|---|
| <i>Neisseria gonorrhoeae</i> ApeB (YP_207683)   | 127 | VFFAGDSLMQGVAPFVQKSLKQQYGI | ESANLSKQSTGLS        | -YPSFFDWP            | K-TIEETLKKHP     | -EISVLAV     | -FLGPN          | PWDF            |         |          |         |        |      |      |      |     |      |     |      |      |     |     |     |   |   |    |   |    |   |     |   |    |   |   |   |   |   |   |   |   |   |   |   |
| <i>Neisseria meningitidis</i> NP_284201)        | 119 | VFFAGDSLMQGVAPFVQKSLKQQYGI | SVNLSKQSTGLS         | -YPSFFDWP            | K-TIEETLKKHP     | -EISVLAV     | -FLGPN          | PWDF            |         |          |         |        |      |      |      |     |      |     |      |      |     |     |     |   |   |    |   |    |   |     |   |    |   |   |   |   |   |   |   |   |   |   |   |
| <i>Neisseria lactamica</i> (ZP_03722920)        | 128 | VFFAGDSLMQGVAPFVQKSLKQQYGI | SVNLSKQSTGLS         | -YPSFFDWP            | K-TVEETLKKHP     | -EISVLAV     | -FLGPN          | PWDF            |         |          |         |        |      |      |      |     |      |     |      |      |     |     |     |   |   |    |   |    |   |     |   |    |   |   |   |   |   |   |   |   |   |   |   |
| <i>Neisseria cinerea</i> (ZP_03744458)          | 120 | VFFAGDSLMQGVAPFVQKSLKQQYGI | SVNLSKQSTGLS         | -YPKFFDWP            | K-TIEETLQKHP     | -EISVLAV     | -FLGPN          | PWDF            |         |          |         |        |      |      |      |     |      |     |      |      |     |     |     |   |   |    |   |    |   |     |   |    |   |   |   |   |   |   |   |   |   |   |   |
| <i>Neisseria flavescens</i> (EEG32498)          | 139 | VFFAGDSLMQGVAPFVQKHLKQEYGV | QSVNLSKQSTGLS        | -YPNFFDWP            | K-TIEQTLQKEP     | -DIRVLV      | -FLGPN          | PWDF            |         |          |         |        |      |      |      |     |      |     |      |      |     |     |     |   |   |    |   |    |   |     |   |    |   |   |   |   |   |   |   |   |   |   |   |
| <i>Neisseria subflava</i> (ZP_03750678)         | 139 | VFFAGDSLMQGVAPFVQKHLKQEYGV | QSVNLSKQSTGLS        | -YPNFFDWP            | K-TIEQTLQKEP     | -DIRVLV      | -FLGPN          | PWDF            |         |          |         |        |      |      |      |     |      |     |      |      |     |     |     |   |   |    |   |    |   |     |   |    |   |   |   |   |   |   |   |   |   |   |   |
| <i>Neisseria mucosa</i> (ACDX02000005.1)        | 143 | VFFAGDSMMQGVAPFVERSLKQYGI  | QSVNLSKQSTGLS        | -YPKFFDWP            | N-TIEQTLKQQT     | -DIRLLV      | -FLGPN          | PWDF            |         |          |         |        |      |      |      |     |      |     |      |      |     |     |     |   |   |    |   |    |   |     |   |    |   |   |   |   |   |   |   |   |   |   |   |
| <i>Neisseria sicca</i> (EET44325)               | 143 | VFFAGDSMMQGVAPFVERSLKQYGI  | QSVNLSKQSTGLS        | -YPKFFDWP            | N-TIEQTLKQQT     | -DIRLLV      | -FLGPN          | PWDF            |         |          |         |        |      |      |      |     |      |     |      |      |     |     |     |   |   |    |   |    |   |     |   |    |   |   |   |   |   |   |   |   |   |   |   |
| <i>Eikenella corrodens</i> (ZP_03713080)        | 263 | VFFAGDSMMEGVAPHVQRWLS      | SSQYGIDSLNLSKQSTGLS  | -YPSFFDWP            | A-TIEKTLREDQ     | -KIRLLV      | -FLGPN          | PWDF            |         |          |         |        |      |      |      |     |      |     |      |      |     |     |     |   |   |    |   |    |   |     |   |    |   |   |   |   |   |   |   |   |   |   |   |
| <i>Kingella oralis</i> (ZP_04600983)            | 143 | VFFTGDSLMQGVAPFVQQS        | LKQQYGIASINLSKQSTGLS | -YPNFFDWP            | L-TIEQTFKENP     | -NIRLMV      | -FLGPN          | PWDF            |         |          |         |        |      |      |      |     |      |     |      |      |     |     |     |   |   |    |   |    |   |     |   |    |   |   |   |   |   |   |   |   |   |   |   |
| <i>Enterobacter sakazaki</i> (ABU75604)         | 161 | VLMI                       | GDSMMEGVAPQIIISL     | LKKEHQIESVNLSKR      | STGLA            | -YPSFFNWP    | KTT-ENTLIREP    | -DIGLLIV        | -FLGPN  | PWDM     |         |        |      |      |      |     |      |     |      |      |     |     |     |   |   |    |   |    |   |     |   |    |   |   |   |   |   |   |   |   |   |   |   |
| <i>Citrobacter youngae</i> (ZP_03836338)        | 161 | VLMI                       | GDSMMEGVAPQIIISL     | LKKEHQIGGVNLSKR      | STGLA            | -YPSFFNWP    | KTT-ENALVRE     | -DIGLLIV        | -FMGPN  | PWDM     |         |        |      |      |      |     |      |     |      |      |     |     |     |   |   |    |   |    |   |     |   |    |   |   |   |   |   |   |   |   |   |   |   |
| <i>Pseudomonas entomophila</i> (CAK13547)       | 158 | VFLV                       | GDSLMQGVAPHLANTL     | LRKRYQIRTVNLSKQSTGLA | -YPGFFNWP        | K-TVAETLDHEP | -NIRLMV         | -FLGPN          | PWDM    |          |         |        |      |      |      |     |      |     |      |      |     |     |     |   |   |    |   |    |   |     |   |    |   |   |   |   |   |   |   |   |   |   |   |
| <i>Pseudomonas fluorescens</i> (YP_262937)      | 167 | VFFV                       | GDSLMQGVAPHMANTL     | LRKRYNVKSLNLSKQSTGLA | -YPSFFNWP        | K-TVESTLASNP | -NIRLMV         | -FLGPN          | PWDM    |          |         |        |      |      |      |     |      |     |      |      |     |     |     |   |   |    |   |    |   |     |   |    |   |   |   |   |   |   |   |   |   |   |   |
| <i>Proteus mirabilis</i> (YP_002152370)         | 171 | VLFA                       | GDSMMQGVAPLLKRQL     | QTDYNISSIDL          | SKQSTGLA         | -YPKFFNWP    | Q-TIANRLASDD    | -SIKLLV         | -FLGPN  | PWDM     |         |        |      |      |      |     |      |     |      |      |     |     |     |   |   |    |   |    |   |     |   |    |   |   |   |   |   |   |   |   |   |   |   |
| <i>Proteus penneri</i> (EEG87531)               | 171 | VLFA                       | GDSMMQGVAPLLKRQL     | KTDYNISSIDL          | SKQSTGLA         | -YPRFFNWP    | Q-TIATRLASDD    | -SIKLLV         | -FLGPN  | PWDM     |         |        |      |      |      |     |      |     |      |      |     |     |     |   |   |    |   |    |   |     |   |    |   |   |   |   |   |   |   |   |   |   |   |
| <i>Providencia stuartii</i> (ZP_02961974)       | 172 | VLFA                       | GDSMMQGVAPHVKNML     | LKHYNIDSINLSKQSTGLA  | -YPRFFNWP        | Q-TISKALNDNP | -KIKVLV         | -FLGPN          | PWDM    |          |         |        |      |      |      |     |      |     |      |      |     |     |     |   |   |    |   |    |   |     |   |    |   |   |   |   |   |   |   |   |   |   |   |
| <i>Providencia rustigianii</i> (ZP_03315886)    | 171 | VLFA                       | GDSMMQGIAPHVKNML     | LKHYNIDSINLSKQSTGLA  | -YPRFFNWP        | E-TIAKALNDNP | -NIKVLV         | -FLGPN          | PWDM    |          |         |        |      |      |      |     |      |     |      |      |     |     |     |   |   |    |   |    |   |     |   |    |   |   |   |   |   |   |   |   |   |   |   |
| <i>Providencia alcalifaciens</i> (EEB46552)     | 171 | VLFA                       | GDSMMQGVAPHVKNML     | LKHYNIESINLSKQSTGLA  | -YPKFFNWP        | D-TIAKALNDNP | -NIKVLV         | -FLGPN          | PWDM    |          |         |        |      |      |      |     |      |     |      |      |     |     |     |   |   |    |   |    |   |     |   |    |   |   |   |   |   |   |   |   |   |   |   |
| <i>Providencia rettgeri</i> (EEF72588)          | 171 | VLFA                       | GDSMMQGVAPHVKNML     | LKHYNIDSINLSKQSTGLA  | -YPRFFNWP        | Q-TIAKALNDNP | -NIKVLV         | -FLGPN          | PWDM    |          |         |        |      |      |      |     |      |     |      |      |     |     |     |   |   |    |   |    |   |     |   |    |   |   |   |   |   |   |   |   |   |   |   |
| <i>Chromobacterium violaceum</i> (NP903735)     | 131 | VLLA                       | GDSMMQGVALLHLLP      | LFRQHVK              | AIDISKQSTGLT     | -YPDFFNWP    | A-TIAERQLANP    | -KTQ            | -LIVMFV | GAND     | TWDM    |        |      |      |      |     |      |     |      |      |     |     |     |   |   |    |   |    |   |     |   |    |   |   |   |   |   |   |   |   |   |   |   |
| <i>Photorhabdus luminescens</i> (NP927854)      | 167 | VLFA                       | GDSMMQGIAPHLKRR      | LYQDYSISSINLSKQSTGLA | -YPSFFNWP        | E-TINKTLEANH | -DIK            | -LVVIFL         | GPN     | PWDM     |         |        |      |      |      |     |      |     |      |      |     |     |     |   |   |    |   |    |   |     |   |    |   |   |   |   |   |   |   |   |   |   |   |
| <i>Photorhabdus asymbiotica</i> (YP_030042693)  | 162 | VLFA                       | GDSMMQGIAPHLKRR      | LFQDYSISSINLSKQSTGLA | -YPSFFNWP        | A-TINKALETNH | -DIK            | -LVIIFL         | GPN     | PWDM     |         |        |      |      |      |     |      |     |      |      |     |     |     |   |   |    |   |    |   |     |   |    |   |   |   |   |   |   |   |   |   |   |   |
| <i>Dickeya zeae</i> (YP_003002389)              | 143 | VLFI                       | GDSMMEGVAPHVIKML     | RDYRSVAGIDLSKR       | STGLT            | -YPHFFNWP    | LILSRELEKRP     | --DIGVLV        | -FLGPN  | PWDM     |         |        |      |      |      |     |      |     |      |      |     |     |     |   |   |    |   |    |   |     |   |    |   |   |   |   |   |   |   |   |   |   |   |
| <i>Campylobacter jejuni</i> (NP281793)          | 131 | FLFI                       | GDSLMQGVAI           | ALNRDLRNLN           | -LKVTDLSKQNTGLS  | -YKSYFDW     | KATNEAFI        | -KNS            | -NIKYL  | VV       | -LLGAND | PWDI   |      |      |      |     |      |     |      |      |     |     |     |   |   |    |   |    |   |     |   |    |   |   |   |   |   |   |   |   |   |   |   |
| <i>Campylobacter coli</i> (ZP_00366779)         | 121 | FLFI                       | GDSLMQGVAI           | ALNRDLIDLG           | -LKANDLSKQNTGLS  | -YKSYFDW     | KATKEAFA        | -KNP            | -NIKYL  | VV       | -LLGAND | PWDI   |      |      |      |     |      |     |      |      |     |     |     |   |   |    |   |    |   |     |   |    |   |   |   |   |   |   |   |   |   |   |   |
| <i>Campylobacter upsaliensis</i> (ZP_00369961)  | 119 | FLLI                       | GDSLMQGVAV           | ALNKDLKLN            | -LKVVDLSKQNTGLS  | -YKSYFDW     | KATK            | -TLQNNK         | -KIKYL  | VV       | -LLGAND | PWDI   |      |      |      |     |      |     |      |      |     |     |     |   |   |    |   |    |   |     |   |    |   |   |   |   |   |   |   |   |   |   |   |
| <i>Campylobacter gracilis</i> (EEV17613)        | 239 | VLFM                       | GDSLMQYVGMNAK        | KFFPKR               | -SLRVIDLSKQSTGLA | -SKKSF       | DWQK-TLDTALRENG | -GVK            | -LVVLL  | GAND     | VWEY    |        |      |      |      |     |      |     |      |      |     |     |     |   |   |    |   |    |   |     |   |    |   |   |   |   |   |   |   |   |   |   |   |
| <i>Campylobacter rectus</i> (EEF14732)          | 181 | VILI                       | GDSIMQGF             | GWGFENAL             | LKTR-KIAIKNMAK   | ASTGLT       | -NKKFYD         | WSEELKTALANLKER | PQNL    | LILALF   | GAND    | AYS    |      |      |      |     |      |     |      |      |     |     |     |   |   |    |   |    |   |     |   |    |   |   |   |   |   |   |   |   |   |   |   |
| <i>Campylobacter showae</i> (EET79176)          | 167 | IILI                       | GDSIMQGF             | GWGFENAL             | KTS-KISIKNMAK    | ASTGLT       | -NKKFYD         | WSEELKAALASLENR | PQNL    | LIFALF   | GAND    | AYS    |      |      |      |     |      |     |      |      |     |     |     |   |   |    |   |    |   |     |   |    |   |   |   |   |   |   |   |   |   |   |   |
| <i>Helicobacter hepaticus</i> (NP860614)        | 214 | VLLI                       | GDSMMQGVAP           | YVLKTFK              | KVN-LRGINLSKH    | STGLT        | -YKHYFN         | WEAALKD-TFAKNP  | -DIALV  | VV       | -LGAND  | PWGM   |      |      |      |     |      |     |      |      |     |     |     |   |   |    |   |    |   |     |   |    |   |   |   |   |   |   |   |   |   |   |   |
| <i>Helicobacter cinaedi</i> (ABQT01000013)      | 214 | ILLI                       | GDSMMQGVAP           | YLLRFT               | FKK-VKIQGINLSKH  | STGLT        | -YKHYFN         | WELATRD-ALEKNP  | -HISL   | VV       | -LGAND  | PWSM   |      |      |      |     |      |     |      |      |     |     |     |   |   |    |   |    |   |     |   |    |   |   |   |   |   |   |   |   |   |   |   |
| <i>Helicobacter bilis</i> (ACDN01000074)        | 214 | FLLI                       | GDSLMQGIGMVL         | PRML-QQHGFRT         | KNLAKQSTGLT      | -YPSFFN      | WERATM          | Q-AFQQYK        | -DIGV   | LV       | -VVC    | -LGAND | PWNM |      |      |     |      |     |      |      |     |     |     |   |   |    |   |    |   |     |   |    |   |   |   |   |   |   |   |   |   |   |   |
| <i>Cardiobacterium hominis</i> (EEV87983)       | 261 | VLLI                       | GDSMMQSL             | APHIQRELL            | ARHHIKSINR       | GKPSGLR      | -YPDYYN         | WPEHLAA-QLEENP  | -DVRLI  | IV       | -LGAND  | PQDT   |      |      |      |     |      |     |      |      |     |     |     |   |   |    |   |    |   |     |   |    |   |   |   |   |   |   |   |   |   |   |   |
| <i>Zymomonas mobilis</i> (YP162179)             | 117 | VGVF                       | GDSYGDGL             | LWSALYRL             | LPAGEYRVL        | KFSQOSTG     | FTRYQSLNVEE     | KAKSD--LVSQ     | PVDI    | -A-VICF  | -GAND   | VQGV   |      |      |      |     |      |     |      |      |     |     |     |   |   |    |   |    |   |     |   |    |   |   |   |   |   |   |   |   |   |   |   |
| <i>Treponema pallidum</i> (ACC65548)            | 165 | ILMC                       | GDSQ                 | MRYLTGGAL            | QVLTSSHV         | QIEVTVSS     | GFVRTD          | -YYHWP          | KFLALD  | THTQ     | QEPYAA  | VIMAF  | GMDY | QNF  |      |     |      |     |      |      |     |     |     |   |   |    |   |    |   |     |   |    |   |   |   |   |   |   |   |   |   |   |   |
| <i>Treponema denticola</i> (ASS11853)           | 251 | ILMI                       | GDSQ                 | MHSIA                | AGFLRL           | TGQNSSIR     | VKEISVHS        | S               | GFIRSD  | -YYNWP   | KLKNV   | FEE    | SQ   | NERY | DI   | AVI | -FLG | MND | YQNF |      |     |     |     |   |   |    |   |    |   |     |   |    |   |   |   |   |   |   |   |   |   |   |   |
| <i>Acidophilus cellulolyticus</i> (ABK52233)    | 91  | IVEI                       | GDSL                 | GIDLG                | YGLRDV           | LAETPGI      | TILIPA          | AYGSS           | GLVR    | -PEFYD   | WQTHL   | QELLN  | R    | YQP  | ---- | LV  | IV   | FL  | GAND | VQNF |     |     |     |   |   |    |   |    |   |     |   |    |   |   |   |   |   |   |   |   |   |   |   |
| <i>Methylobacterium populi</i> (ACB61819)       | 163 | IAVF                       | GDSLAGYL             | AKGADDA              | FSDNAE           | VAVLDR       | SKADS           | GLVR            | KD-LVD  | WAK-TAED | FL      | KATP   | --   | KV   | S    | Y   | AL   | MMI | G    | V    | NDR | QAI |     |   |   |    |   |    |   |     |   |    |   |   |   |   |   |   |   |   |   |   |   |
| <i>Methylobacterium extorquens</i> (ABY31658)   | 167 | IQVF                       | GDSLAGYL             | AKGADDA              | FSDNAE           | VAVLDR       | SKADS           | GLVR            | KD-LVD  | WAK-TAED | FL      | KATP   | --   | KV   | S    | Y   | AL   | MMI | G    | N    | D   | R   | QAI |   |   |    |   |    |   |     |   |    |   |   |   |   |   |   |   |   |   |   |   |
| <i>Parvibaculum lavamentivorans</i> (ABS63572)  | 80  | VVVL                       | GDSL                 | GDGM                 | WAGLYH           | LRQDKR       | FNVI            | KKSR            | VATG    | F        | S       | RQD    | -YYD | W    | N    | E   | A    | V   | R    | --   | I   | A   | E   | T | K | -I | D | I  | A | V   | V | -M | G | T | N | D | R | Q | P |   |   |   |   |
| <i>Lawsonia intracellularis</i> orf (YP_594856) | 174 | ILII                       | GDSM                 | INEGL                | GPVL             | QKTL         | HNQY            | PFK             | VREG    | KYST     | GL      | LSR    | PDY  | F    | N    | W   | P    | E   | L    | T    | F   | L   | V   | N | K | H  | H | -P | K | --- | L | I  | I | L | C | L | G | A | N | D | A | Q | D |

*N. gonorrhoeae* ApeB PV--GKRYLKFASDEWAQEYLRVDRILEEAH<sup>TH</sup>RVQV<sup>VW</sup>LGIPYMKKVKLDGQMRYLDKLLS-EHLKGKIILIPTA--  
*N. meningitidis* orf PV--GKRYLKFASDEWAQEYLRVDRILEEAH<sup>TH</sup>YVQV<sup>VW</sup>LGIPYMKKAKLDGQMRYLDKLLS-EY-KGKIILIPTA--  
*N. lactamica* orf PV--GKRYLKFASDEWAQEYLRVDRILEEAARAH<sup>HV</sup>QV<sup>VW</sup>LGIPYMKKAKLDGQMRYLDKLLS-EHLEGGKIILIPTA--  
*N. cinerea* orf PV--GKQYLKFASDEWAQEYLRVDRILEEAH<sup>TH</sup>HVQV<sup>VW</sup>LGIPYMKKAKLDGQM<sup>H</sup>YLDKLLS-EHLEGGKIILIPTA--  
*N. flavescens* orf PM--GKKYLKFASPEWEAEYLNRRVRRILDASSAH<sup>DV</sup>QV<sup>VI</sup>WLGIPYMKKAKLNEQMRYLDKILS-GTVSPQAIWLPTD--  
*N. subflava* orf PM--GKKYLKFASPEWEAEYLNRRVRRILDASSAH<sup>DV</sup>QV<sup>VI</sup>WLGIPYMKKAKLNEQMRYLDKILS-GTVSPQAIWLPTD--  
*N. mucosa* orf PK--GKKYLKFASPEWSEY<sup>LS</sup>RVNRILSAAEQH<sup>HV</sup>QV<sup>VI</sup>WLGIPYMKQAKLNKQMRYLDKLLADE-ISP<sup>K</sup>ALWIPTD--  
*N. sicca* orf PK--GKKYLKFASPEWSEY<sup>LS</sup>RVNRILSAAEQH<sup>HV</sup>QV<sup>VI</sup>WLGIPYMKQAKLNKQMRYLDKLLADE-ISP<sup>K</sup>ALWIPTD--  
*E. corrodens* orf PNPEGRGYLKFQSP<sup>WE</sup>QVYRQRIERIVTAAKAAD<sup>VQ</sup>I<sup>I</sup>WLGVP<sup>LM</sup>KSSRLNAQMRYLDSLFASE-LAGKTIWLPTD--  
*K. oralis* orf PNPKGAYLKFQTP<sup>WE</sup>AEYLNRRVNRILDTAKQ<sup>HN</sup>AV<sup>VI</sup>WLGVPYMKKKKLLDDQMRYLDKLFAAH-LKDKVFWIPTA--  
*E. sakazaki* orf PSEQNRHFLKFKSAEWENEYRQRIERILTSAQQRNI<sup>P</sup>VIWALLPVMRKS<sup>KL</sup>NAGVSYLNTLYAE<sup>EV</sup>SKAGGVTV<sup>VD</sup>VN--  
*C. youngae* orf PSERNRHF<sup>L</sup>KFKSAEWESEYRQRIERILASAQQRNI<sup>P</sup>VIWALPVMRKS<sup>KL</sup>NAGV-----VSNSGGVTV<sup>VD</sup>VN--  
*P. entomophila* orf PQGKGKPF<sup>L</sup>RFKSP<sup>WE</sup>EVAYRARIDAILEQARA<sup>HN</sup>VQV<sup>LV</sup>WGP<sup>PN</sup>MEKARLSTAMNYLSGLY-QEQTALFQHY<sup>VS</sup>AN--  
*P. fluourescens* orf PVVKGKPF<sup>L</sup>RFKTP<sup>WE</sup>EAYRQRIDSILDTAQAH<sup>NV</sup>QV<sup>VI</sup>WGP<sup>PN</sup>MEKPKLSTAMAYLSQLYK<sup>GQ</sup>IEQYHQHY<sup>VS</sup>AN--  
*P. mirabilis* orf PPDGGRYLKFAS<sup>E</sup>AWGTL<sup>Y</sup>RARIASIIDNARQH<sup>NV</sup>S<sup>VI</sup>WIGP<sup>PN</sup>MRKQKLSQGMAYLNQLY<sup>REE</sup>EA<sup>EKT</sup>G<sup>EI</sup>Y<sup>LS</sup>VN--  
*P. penneri* orf PPDGGRYLKFAS<sup>E</sup>AWESAYRARIASIIENARQ<sup>NN</sup>V<sup>TV</sup>WIGP<sup>PN</sup>MRKQKLSKGMAYLDKLY<sup>REE</sup>EA<sup>EKM</sup>G<sup>EI</sup>Y<sup>LS</sup>VN--  
*P. stuartii* orf PPDTGYKYV<sup>FK</sup>SEI<sup>WE</sup>QVYRSRINDILTTARQ<sup>HN</sup>VD<sup>VI</sup>WGP<sup>PN</sup>MRKSTLSEGM<sup>R</sup>FLRS<sup>SLY</sup>QSEVEN<sup>S</sup>G<sup>EI</sup>Y<sup>FS</sup>VN--  
*P. rustigianii* orf PPQ<sup>T</sup>GYKYV<sup>FK</sup>SE<sup>WE</sup>QVYRSRINDILATARQ<sup>HN</sup>VD<sup>VI</sup>WGP<sup>PN</sup>MRKNNLS<sup>D</sup>GMK<sup>F</sup>LR<sup>SLY</sup>QSEVE<sup>K</sup>Y<sup>G</sup>EM<sup>Y</sup>ISAN--  
*P. alcalifaciens* orf PPQSGYKYV<sup>FK</sup>SE<sup>WE</sup>QTYRSRISEILTTARQ<sup>H</sup>Q<sup>VD</sup>VIWGP<sup>PN</sup>MRKNTLS<sup>D</sup>GMK<sup>F</sup>LR<sup>GLY</sup>QTEVAKY<sup>G</sup>EM<sup>Y</sup>ISAN--  
*P. rettgeri* orf PPQ<sup>T</sup>GYKYV<sup>FK</sup>SD-WEKVYRERIG<sup>DI</sup>ISTARQ<sup>HN</sup>VD<sup>VI</sup>WGP<sup>PN</sup>MRKNTLS<sup>D</sup>GMK<sup>F</sup>LS<sup>SLY</sup>QSEVED<sup>N</sup>G<sup>EI</sup>Y<sup>FS</sup>VN--  
*C. violaceum* orf --VNGNHYIR<sup>F</sup>ASPD<sup>WE</sup>QRYRERIRSILASAGKR<sup>KV</sup>VL<sup>WL</sup>GLPNMSR<sup>D</sup>DKLNDG<sup>VH</sup>YLNR<sup>LY</sup>REEVAAG<sup>G</sup>GR<sup>F</sup>ISTR--  
*P. luminescens* orf PPKHGNIY<sup>L</sup>KFASPD<sup>W</sup>ENLYRQRIEM<sup>VL</sup>TEARN<sup>H</sup>GAD<sup>I</sup>WVAP<sup>PN</sup>MRQK<sup>KL</sup>SANM<sup>KY</sup>LR<sup>SLY</sup>QSEVTKAGEI<sup>YV</sup>SVN--  
*P. symbiotica* orf PPEHGRIY<sup>L</sup>KFASPD<sup>W</sup>ENLYRQRIEM<sup>VL</sup>TEARN<sup>H</sup>GAD<sup>I</sup>WVAP<sup>PN</sup>MRQK<sup>KL</sup>STSM<sup>KY</sup>LR<sup>SLY</sup>QSEVAKAGEI<sup>YV</sup>SVN--  
*D. zeae* orf P<sup>SG</sup>NGKN<sup>FL</sup>KFESPA<sup>WE</sup>SAYRDRIRSILHSARE<sup>KR</sup>IS<sup>VI</sup>WIS<sup>P</sup>PNVEN<sup>KL</sup>NHG<sup>IN</sup>YIND<sup>L</sup>F<sup>E</sup>SEV<sup>K</sup>AG<sup>NE</sup>ISIR<sup>VN</sup>--  
*C. jejuni* orf -KKG<sup>GN</sup>-YHR<sup>FG</sup>SL<sup>SW</sup>ID<sup>I</sup>Y<sup>TS</sup>RV<sup>DE</sup>II<sup>KI</sup>AK<sup>KK</sup>H<sup>K</sup>AK<sup>V</sup>F<sup>WF</sup>EI<sup>PP</sup>V<sup>KK</sup>ED<sup>LN</sup>KK<sup>I</sup>Q<sup>VL</sup>N<sup>KI</sup>Y<sup>S</sup>DE<sup>IL</sup>KN<sup>KE</sup>IF<sup>INT</sup>K--  
*C. coli* orf -KKG<sup>G</sup>-VYHR<sup>FG</sup>SD<sup>SW</sup>ID<sup>I</sup>Y<sup>TY</sup>RV<sup>NE</sup>II<sup>NI</sup>AK<sup>QH</sup>H<sup>A</sup>K<sup>IL</sup>W<sup>FE</sup>IP<sup>P</sup>V<sup>KK</sup>NE<sup>LN</sup>E<sup>KI</sup>Q<sup>IL</sup>N<sup>KI</sup>Y<sup>SE</sup>E<sup>IL</sup>KN<sup>K</sup>Q<sup>IF</sup>INTK--  
*C. upsaliensis* orf -KKG<sup>G</sup>-IYHR<sup>F</sup>NS<sup>SK</sup>SW<sup>LE</sup>IY<sup>TQ</sup>RV<sup>DE</sup>IL<sup>KI</sup>AA<sup>KY</sup>NA<sup>KV</sup>L<sup>W</sup>Y<sup>EI</sup>PP<sup>V</sup>KK<sup>DD</sup>LN<sup>KK</sup>LS<sup>VL</sup>N<sup>QI</sup>Y<sup>S</sup>Q<sup>E</sup>IL<sup>KN</sup>K<sup>G</sup>IF<sup>INT</sup>K--  
*C. gracilis* orf -RAG<sup>G</sup>K<sup>TY</sup>-GIKT<sup>PR</sup>W<sup>REF</sup>YAS<sup>RV</sup>REI<sup>Y</sup>DTA<sup>HS</sup>H<sup>G</sup>AG<sup>V</sup>L<sup>WL</sup>AMP<sup>CM</sup>Q<sup>K</sup>PDF<sup>E</sup>E<sup>K</sup>T<sup>QL</sup>LN<sup>QI</sup>YA-DAS<sup>M</sup>AL<sup>GGY</sup>-FM<sup>Q</sup>--  
*C. rectus* orf SYS<sup>F</sup>DERT<sup>LD</sup>DFG<sup>SE</sup>AW<sup>RE</sup>AYEG<sup>RIA</sup>EI<sup>Y</sup>EIAE<sup>EH</sup>G<sup>A</sup>Q<sup>V</sup>W<sup>VL</sup>GI<sup>PC</sup>M<sup>K</sup>SE<sup>K</sup>FD<sup>KK</sup>M<sup>K</sup>AL<sup>N</sup>LI<sup>YK</sup>DA<sup>AQ</sup>K<sup>Y</sup>G<sup>ARY</sup>ID<sup>IG</sup>--  
*C. showae* orf --TFDE<sup>Q</sup>AL<sup>DF</sup>GT<sup>DA</sup>W<sup>RE</sup>AYEG<sup>RIA</sup>EI<sup>Y</sup>EIAE<sup>EH</sup>G<sup>A</sup>Q<sup>V</sup>W<sup>VL</sup>GI<sup>PC</sup>M<sup>K</sup>SE<sup>K</sup>FD<sup>KK</sup>M<sup>K</sup>AL<sup>N</sup>LI<sup>YK</sup>-DS<sup>AQ</sup>-----  
*H. hepaticus* orf --K--NIS--FK<sup>S</sup>VR<sup>WE</sup>E<sup>TY</sup>I<sup>Q</sup>RIE<sup>E</sup>IL<sup>NV</sup>A<sup>HS</sup>Y<sup>G</sup>AR<sup>V</sup>W<sup>Y</sup>EV<sup>PS</sup>V<sup>S</sup>SK<sup>SL</sup>ND<sup>KI</sup>V<sup>YL</sup>NS<sup>LY</sup>--ERV<sup>V</sup>KEE<sup>G</sup>EY<sup>FL</sup>Q--  
*H. cinaedi* orf --KKG---IA<sup>F</sup>KS<sup>PL</sup>W<sup>E</sup>E<sup>I</sup>Y<sup>TQ</sup>RI<sup>DE</sup>IL<sup>QV</sup>AK<sup>AY</sup>N<sup>V</sup>RV<sup>AW</sup>Y<sup>EV</sup>PS<sup>V</sup>RE<sup>K</sup>SL<sup>ND</sup>K<sup>I</sup>M<sup>Y</sup>LN<sup>SLY</sup>ES<sup>AV</sup>K<sup>Q</sup>SE<sup>EY</sup>FL<sup>Q</sup>SN--  
*H. bilis* orf P-----KMR<sup>F</sup>GT<sup>ES</sup>W<sup>E</sup>EV<sup>Y</sup>KN<sup>RI</sup>Q<sup>AI</sup>I<sup>NI</sup>AK<sup>SH</sup>GT<sup>QV</sup>V<sup>W</sup>Y<sup>AV</sup>P<sup>M</sup>T<sup>K</sup>NE<sup>T</sup>LN<sup>KK</sup>L<sup>AY</sup>LN<sup>TL</sup>Y<sup>Y</sup>-Q<sup>V</sup>V<sup>S</sup>ANG<sup>G</sup>IF<sup>L</sup>TA--  
*C. hominis* orf NPA<sup>AE</sup>Q<sup>KL</sup>N<sup>FG</sup>T<sup>PE</sup>W<sup>EN</sup>Y<sup>R</sup>GE<sup>IR</sup>K<sup>IL</sup>Q<sup>T</sup>AA<sup>AR</sup>G<sup>AK</sup>T<sup>L</sup>W<sup>IG</sup>P<sup>LM</sup>K<sup>AP</sup>K<sup>Y</sup>SK<sup>KI</sup>T<sup>YL</sup>D<sup>GL</sup>I<sup>AD</sup>E<sup>VE</sup>KA<sup>Q</sup>Q<sup>H</sup>Y<sup>Q</sup>NTN--  
*Z. mobilis* orf --LVGH<sup>HA</sup>AP<sup>LL</sup>SAE<sup>WR</sup>Q<sup>VI</sup>G<sup>D</sup>RIE<sup>S</sup>F<sup>V</sup>S<sup>ML</sup>R<sup>Q</sup>K<sup>G</sup>IS<sup>VY</sup>W<sup>VL</sup>GI<sup>PV</sup>MR<sup>K</sup>AD<sup>F</sup>D<sup>AS</sup>ISS<sup>M</sup>NS<sup>F</sup>Y<sup>AA</sup>E<sup>MA</sup>KL<sup>N</sup>-VP<sup>F</sup>I<sup>ET</sup>--  
*T. pallidum* orf YDAD<sup>G</sup>SLC-VTK<sup>T</sup>AR<sup>WE</sup>RAYEQ<sup>K</sup>MRAC<sup>LN</sup>II<sup>L</sup>HT<sup>VP</sup>K<sup>V</sup>Y<sup>LL</sup>GM<sup>P</sup>ETR<sup>N</sup>K<sup>Q</sup>L<sup>NE</sup>K<sup>L</sup>V<sup>Y</sup>IE<sup>HV</sup>---Q<sup>KK</sup>V<sup>V</sup>A<sup>Q</sup>Y<sup>DP</sup>Q<sup>R</sup>V<sup>RY</sup>  
*T. denticola* orf YAD<sup>NG</sup>-K<sup>VL</sup>V<sup>K</sup>ET<sup>ED</sup>W<sup>ES</sup>AY<sup>R</sup>DK<sup>V</sup>I<sup>TH</sup>L<sup>D</sup>VL<sup>F</sup>ANT<sup>KK</sup>V<sup>Y</sup>W<sup>LG</sup>M<sup>P</sup>IV<sup>RD</sup>-KI----Y<sup>NA</sup>Q<sup>LY</sup>I-ED<sup>L</sup>Q<sup>KK</sup>IA<sup>S</sup>E<sup>Y</sup>SS<sup>II</sup>  
*A. cellulolyticus* orf -FAD<sup>G</sup>-R<sup>Y</sup>E<sup>K</sup>F<sup>GT</sup>PE<sup>W</sup>RT<sup>V</sup>Y<sup>AA</sup>RV<sup>G</sup>AL<sup>M</sup>DE<sup>AV</sup>AG<sup>GA</sup>Q<sup>VL</sup>W<sup>VG</sup>M<sup>P</sup>AM<sup>RD</sup>PA<sup>F</sup>DF<sup>F</sup>AM<sup>SEL</sup>D<sup>G</sup>IF<sup>R</sup>QEA<sup>AG</sup>R<sup>AG</sup>V<sup>RY</sup>F<sup>AS</sup>R--  
*M. populi* orf --REG<sup>D</sup>Q<sup>T</sup>VE<sup>T</sup>LSD<sup>K</sup>W<sup>REL</sup>Y<sup>G</sup>AR<sup>V</sup>DA<sup>V</sup>V<sup>K</sup>V<sup>F</sup>AD<sup>H</sup>K<sup>V</sup>PL<sup>I</sup>W<sup>VL</sup>GP<sup>P</sup>VR<sup>SE</sup>SLSR<sup>D</sup>F<sup>AT</sup>IND<sup>L</sup>V<sup>R</sup>-ERV<sup>Q</sup>R<sup>AG</sup>Q<sup>S</sup>-Y<sup>AE</sup>I<sup>W</sup>  
*M. extorquens* orf --REG<sup>D</sup>Q<sup>S</sup>VE<sup>AL</sup>SD<sup>K</sup>W<sup>REI</sup>Y<sup>AA</sup>RV<sup>D</sup>E<sup>V</sup>AK<sup>V</sup>FA<sup>EH</sup>K<sup>V</sup>PL<sup>I</sup>W<sup>VL</sup>GP<sup>P</sup>VR<sup>SE</sup>SLSR<sup>D</sup>F<sup>AA</sup>IND<sup>L</sup>V<sup>R</sup>-ERV<sup>Q</sup>R<sup>AG</sup>Q<sup>S</sup>Y<sup>AE</sup>EV<sup>W</sup>  
*P. lavamentivorans* orf -VEN<sup>G</sup>V<sup>RY</sup>AL<sup>F</sup>-DD<sup>N</sup>W<sup>REV</sup>Y<sup>K</sup>RR<sup>V</sup>DD<sup>F</sup>TAT<sup>L</sup>QAT<sup>G</sup>ARI<sup>Y</sup>W<sup>L</sup>QL<sup>PV</sup>M<sup>RS</sup>PR<sup>F</sup>G<sup>AD</sup>M<sup>AS</sup>F<sup>NE</sup>I<sup>F</sup>E-ER<sup>AL</sup>ANG<sup>V</sup>DF<sup>V</sup>RT<sup>E</sup>G  
*L. intracellularis* orf -FDD<sup>K</sup>N<sup>H</sup>RY<sup>H</sup>PG<sup>S</sup>Q<sup>EW</sup>KKI<sup>Y</sup>T<sup>NR</sup>AK<sup>H</sup>LL<sup>NI</sup>A<sup>T</sup>S<sup>Q</sup>G<sup>AY</sup>V<sup>I</sup>W<sup>AG</sup>L<sup>P</sup>IM<sup>G</sup>K<sup>V</sup>P<sup>Y</sup>AT<sup>RI</sup>Q<sup>Y</sup>V<sup>SE</sup>C<sup>Q</sup>K-KAC<sup>DE</sup>T<sup>V</sup>NT<sup>Q</sup>F<sup>ID</sup>T<sup>Q</sup>

\* \*

|                               |                                                                                           |
|-------------------------------|-------------------------------------------------------------------------------------------|
| <i>N. gonorrhoeae</i> ApeB    | QTL-S-G-GKG--RYT-DSVNVNGK-PVRYRSK <b>DGIHFTAE</b> GQKLLAEKIMEKIVFEPSTQPSSTQP              |
| <i>N. meningitidis</i> orf    | HTL-S-G-GKD--RYT-DSVNVNGK-PVRYRSK <b>DGIHFTAE</b> GQKLLAAKIMEKIVFEPSTQPSSTQP              |
| <i>N. lactamica</i> orf       | HTL-S-G-GED--RYT-DSVNVNGK-PVRYRSK <b>DGIHFTAE</b> GQKLLAAKIMEKIVFEPSTQPSSTQP              |
| <i>N. cinerea</i> orf         | HTL-S-G-GED--RYT-DSVNVNGK-SVRYRSK <b>DGIHFTAE</b> GQKLLAAKIMEKIVFEPSTQPSAQP               |
| <i>N. flavescens</i> orf      | KLL-SNG-AEE---YA-DSVKVDGK-IIRYRSK <b>DGIHFSAE</b> GQKLLAGKIMEKINFTHDTQP                   |
| <i>N. subflava</i> orf        | KLL-SNG-AEE---YA-DSVKVDGK-IIRYRSK <b>DGIHFSAE</b> GQKLLAGKIMEKINFTHDTQP                   |
| <i>N. mucosa</i> orf          | KLL-SNG--SDT--YA-DSVNINGK-IIRYRSK <b>DGIHFSAE</b> GQKLLADKIMEKIVFQ                        |
| <i>N. sicca</i> orf           | KLL-SNG--SDT--YA-DSVNINGK-IIRYRSK <b>DGIHFSAE</b> GQKLLADKIMEKIVFQTTPEMNGEERTEQLSAR       |
| <i>E. corrodens</i> orf       | KIM--GG--EDG-QY-RDSIIINGQ-TVRLRSK <b>DGIHFTIK</b> GQQLADQIAGRIDYRANAVAPATPAASETVMASGKS    |
| <i>K. oralis</i> orf          | NLL-SNGG--N--EYS-DSVEIGGK-IVRYRSK <b>DGIHFSVE</b> GQKLLAQAIMQKIEFAQP                      |
| <i>E. sakazaki</i> orf        | N-I-F-GY-KDN-HY-SPNTVVVGK-RMRVRAD <b>DGIHYSPE</b> GQRLIARAILNKIQF                         |
| <i>C. youngae</i> orf         | T-L-F-GY-KDN-HY-SPNAVIDGK-KMRVRAD <b>DGIHYSPE</b> GQRLIARAILTKIQFPEKNKE                   |
| <i>P. entomophila</i> orf     | PMFIL-GY-TDE-SYSYTVRTPGK-RVKVRVD <b>DGIHFTIT</b> GQKLIAEQVLSLISFPGLTVTGH                  |
| <i>P. fluourescens</i> orf    | EIL--GYQSDEFSYY-RTTG-DGK-KVKTRVD <b>DGIHFTTT</b> GQKLIARVLSLINF-PSQQ                      |
| <i>P. mirabilis</i> orf       | D-----KYEKD--IYS-DYIG-DGSSRVKLRAG <b>DGIHFSLK</b> GQQIIAQQVFSRIHLQKVDDVDDVTDKNMVTNETIN    |
| <i>P. penneri</i> orf         | DMF---KYEKD--IYS-DYMG-DGSSRVKLRAG <b>DGIHFSLK</b> GQQIIAQHVFSRIHLQEEESK                   |
| <i>P. stuartii</i> orf        | DVF---KY-KDL-TYS-DYFG-DDSSKIKLRSG <b>DGIHFS</b> PKGQQAIAEKVFSLIHFEEKEIPEHAEQTASRQIQVSGS   |
| <i>P. rustigianii</i> orf     | DVF---KYKND--DYS-DYIG-DGSNAIKLRSG <b>DGIHFS</b> SGKGQQMIAERVFSLIHFEEGDKEPHETE             |
| <i>P. alcalifaciens</i> orf   | DVF---KYKND--DYS-DYIG-DGSNAIKLRSG <b>DGIHFS</b> SGKGQQMIAESVFSLIHFEEEDKEPHEAEQPESGQEQATHS |
| <i>P. rettgeri</i> orf        | DVF---KYKGD--TYS-DYIG-DASSTIKLRSG <b>DGIHFS</b> SGKGQQLIAEKVFSLIHFEEEEKEPHETEQTVSS        |
| <i>C. violaceum</i> orf       | ETL---GSQDD--SFNKFMTPDQ-GEVAVRTA <b>DGVHFTTR</b> GQQLLARRVLAELRFEQLASSQEATLD              |
| <i>P. luminescens</i> orf     | DIF-----KYHANDYS-DYVG-DNSNKIKLRSG <b>DGIHFS</b> SLKGQQTISDNIFSLIKFIQEPAKQENNS             |
| <i>P. asymbiotica</i> orf     | NIF-----KYHSDDYS-DYIG-DNSNKIKLRSG <b>DGIHFS</b> SLKGQQAISDNIFSLIEFIQEPAKQNGNA             |
| <i>D. zeae</i> orf            | EIF---G--YQREVYSPDME--KNAKAVRI <b>RTDGVHFS</b> SLTGQKMIAERIFSKINVKPSLNEINH                |
| <i>C. jejuni</i> orf          | --LFFSVND-EYSAYIKD----ENNRSIKV <b>RTDGVHFTPS</b> GAREMSKLLLEHIKLEENASK                    |
| <i>C. coli</i> orf            | --LFFSVND-EFSTYIKN----ENNKSIM <b>RTDGIHFTSN</b> GAKEMSKLLLQHITIKEENAN                     |
| <i>C. upsaliensis</i> orf     | --LFFSKND-AYSAYIKD----ENNKSIM <b>RSDDGVHFTPS</b> GAKEMSKLLLEYIKLKDNNASF                   |
| <i>C. gracilis</i> orf        | TTPLVCEKGVYKT-Y-----LQSGSKLVRVR <b>QDDGIHMSKE</b> GCEAVAKEILSRIEVE                        |
| <i>C. recturs</i> orf         | GAIC---KGG---KFLKA----GADKKPL <b>RNDGVHIS</b> SMNGAKKVAVYVVDKLLNGQSDKF                    |
| <i>C. showae</i> orf          | KYG-ARYIDISGAICDNGKYLKEGADKKPL <b>RKDDGMHIS</b> SMNGAKKIAVYVVDKLLNGQSDNF                  |
| <i>H. hepaticus</i> orf       | SNI-ITQGG----KYSAFIKNANGK-SVQVRID <b>DGVHFTAR</b> GYQIMANIFLNALEIIPQVKELDVQEDSIHSLPAQDVE  |
| <i>H. cinaedi</i> orf         | G-I-VTQGG----KYSAFIKNAKNGK-SVQVRAD <b>DGVHFTTR</b> GYQIMANILLNSLEVLPLENAPQESEF            |
| <i>H. bilis</i> orf           | DAI--LHNGKF-SAYIKD---SSGR-SRLV <b>RAQDGIHFTPY</b> GSRLAKTILDRIVL                          |
| <i>C. hominis</i> orf         | R-LFAKADG---S-YTAFLPDERGK-PVAVR <b>KGDGIHFTGP</b> GKILTRHIEQINP                           |
| <i>Z. mobilis</i> orf         | RSLTVDENGQYAP-YLMDGTN-DATKMTLM <b>RANDGVHMSMT</b> GYVRLSRGLASQIRHFADQHRPKLPATSSSETASLVASQ |
| <i>T. pallidum</i> orf        | YSLKPIVPGVHGTYASAIRDTHGR-WVHVMHK <b>DGIHYTIE</b> GGAYVMETLLPLILADLERSRHGYMRSSLGSHELPAK    |
| <i>T. denticola</i> orf       | LNKSSIAPGEGVP-YTDTVKTAEGK-KIRLMKD <b>DGHYTVS</b> GGEYIMQPFLELLYKDWLEPCTP                  |
| <i>A. cellulolyticus</i> orf  | PVL---AGPDGG-YAASVTTSSGR-RVVAR <b>APDGVHITF</b> -GTPE-SGATLLAQAVVGALHAAFGLR               |
| <i>M. populi</i> orf          | QGF-VDDRNRFTASGPD---VDGQ-EARL <b>RTSDGIHFTAA</b> GSRKIAHFADVELKRLMGEKGGLPSEQPAA           |
| <i>M. extorquens</i> orf      | -GF-VDDRNRFTASGPD---VDGQ-EARL <b>RTSDGIHFTAA</b> GSRKVAHFADVELKRLMGEKGGLPSEQPAAAIAATPGE   |
| <i>P. lavamentivorans</i> orf | --LASGADGSY-TAYGED---RFGR-TRLL <b>RAEDGIHFTMA</b> GYELLSGKVADAILADITEATAPRIATTAPVMLRAVEET |
| <i>L. intracellularis</i> orf | SVLA-TPQGY-TTYTQE-----SNKHIRL <b>RAKDGIVTEA</b> GRLLMNHLMPYIKQSLETITVNTTKDNKQD            |

**Figure 1.** Sequence alignment of *N. gonorrhoeae* Ape2/PatB with hypothetical proteins identified in the nucleotide sequence database. The residues in bold face and yellow highlight denote greater than 50% and 80% identity, respectively, while those in red are invariant amongst all sequences. The potential catalytic residues are denoted by the red asterisks. The accession numbers of the hypothetical proteins are provided in parenthesis.

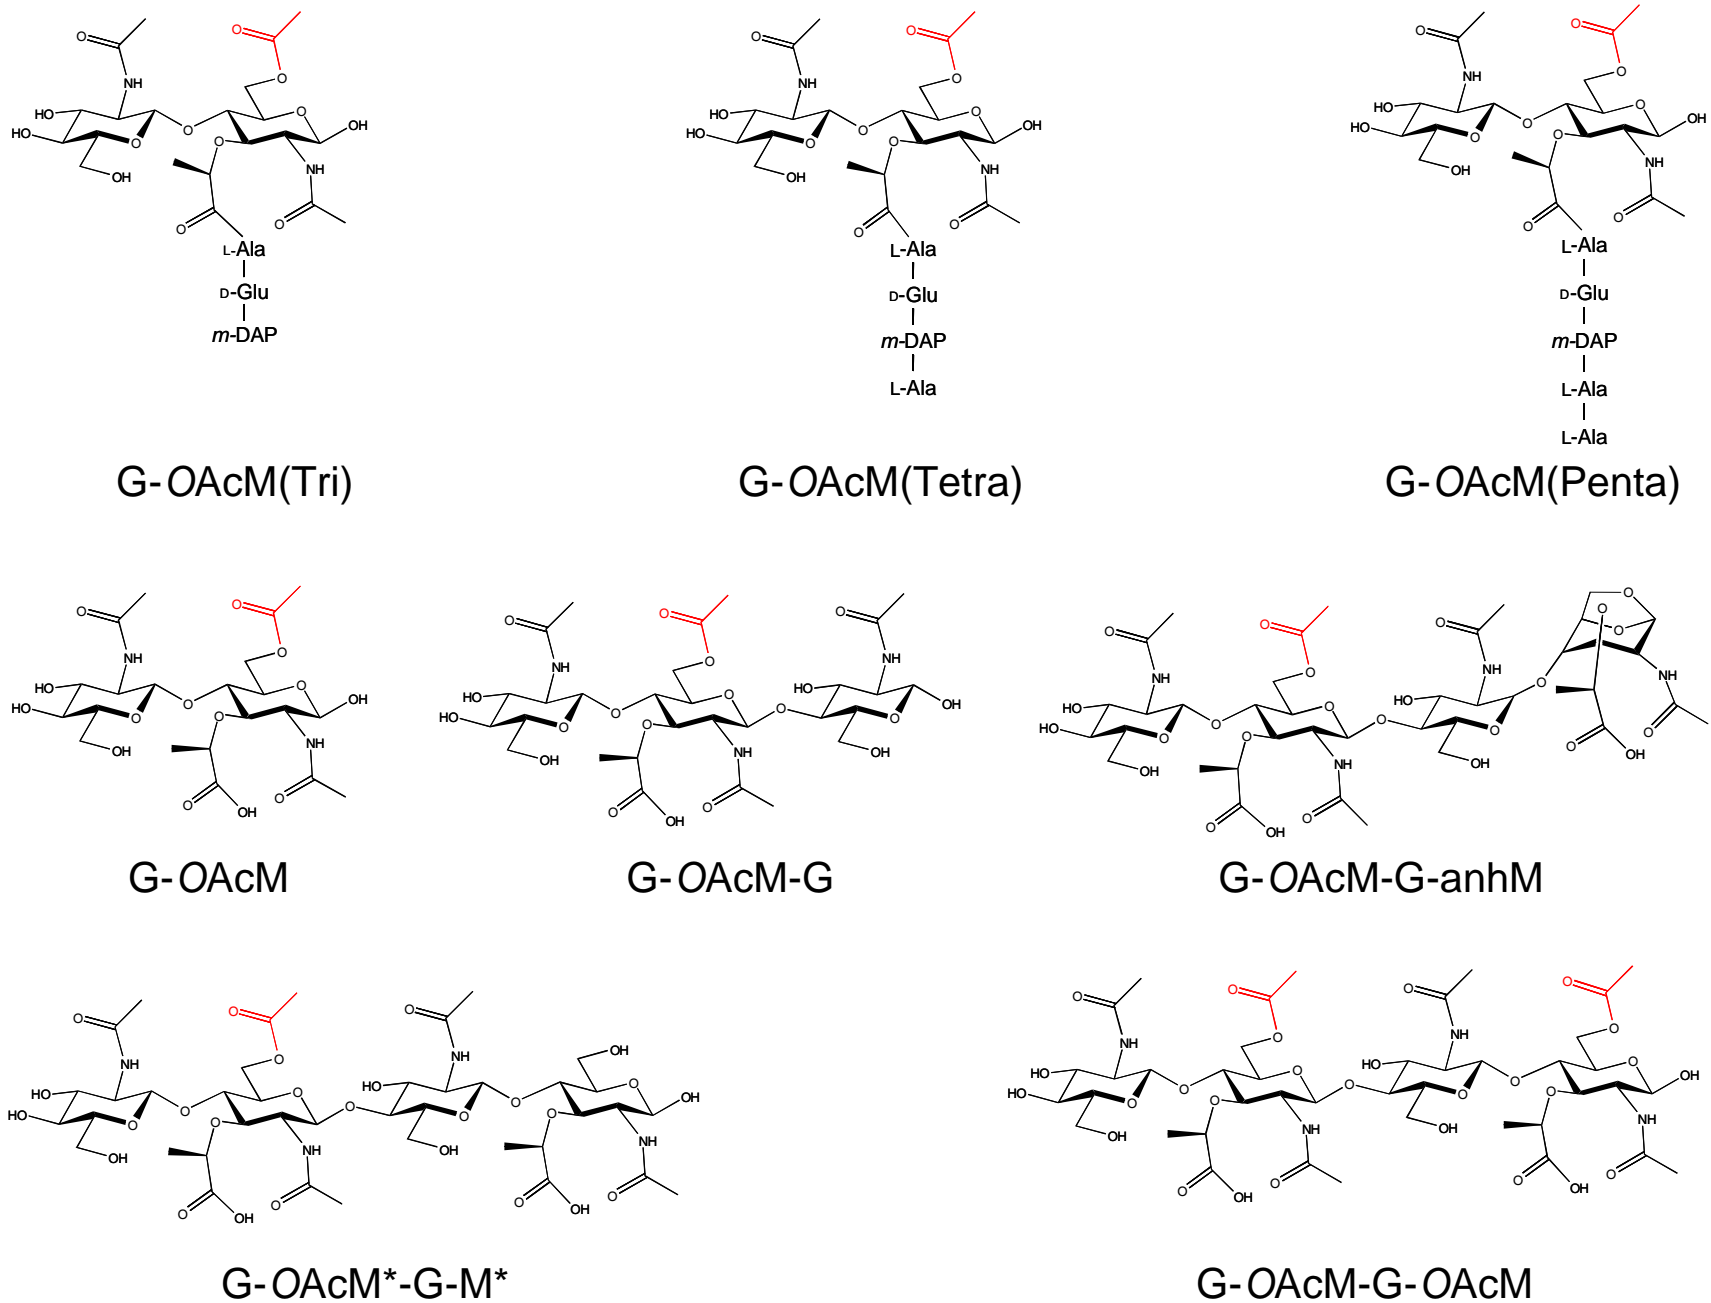

Fig. 2. Structures of unique muropetides and muroglycans identified in PG digests from PatB overproduced in permeabilized cells of *E. coli* Top10[pACPM19]. O-Linked acetate is in red and the asterisks denote that the O-acetate groups could be on either of the MurNAc residues. G, GlcNAc; M, MurNAc; anhM, 1,6-anhydroMurNAc; Tri, tripeptide; Tetra, tetrapeptide; Penta, pentapeptide.
